# Supplementary material
Source: Springer Nature journal article supplement (https://www.springerprofessional.de/resource/supplementary/13173_2013_9_MOESM3_ESM.pdf/11897010)
Supplement: MOESM3 [file 11897010]

```
SELECT COUNT(DISTINCT session.session_id) FROM
session, usage, page, parameter_page WHERE
session.session_id = usage.session_id AND
usage.page_id = page.page_id AND page.uri LIKE
'%product_info.asp%' AND page.page_id =
parameter_page.page_id AND parameter_page.name =
'product' AND parameter_page.value = 'laptop'
```
